# Supplementary material
Source: Research Square preprint supplement (doi:10.21203/rs.3.rs-9518877/v1)
Supplement: Supplementary file 1 [file f90125768ace08110d32f7a0.pdf]

Supplementary material for

# High-throughput solid microsampling through stochastic robotic automation

Adam Lisowski, Henryk Żołnowski, Keyan Villat, Alec Schmidt, Edy Mariano, Jean-Charles Cousty, Jérôme Guérin, Ashley Stark, Frédéric Vasserot, Achim Ammon, David Gueller, Florian de Nanteuil, Jean-Jacques Schwartz, Mathias Cherbuin, Marc Kunze, Giuseppe Costanzo, Pascal Miéville\*

\*pascal.mieville@epfl.ch

codes available at [www.github.com/swisscatplus/DC\\_Sampler](http://www.github.com/swisscatplus/DC_Sampler)

## S1 - Global STORMS workflow as deployed at EPFL Swiss Cat+ West Hub

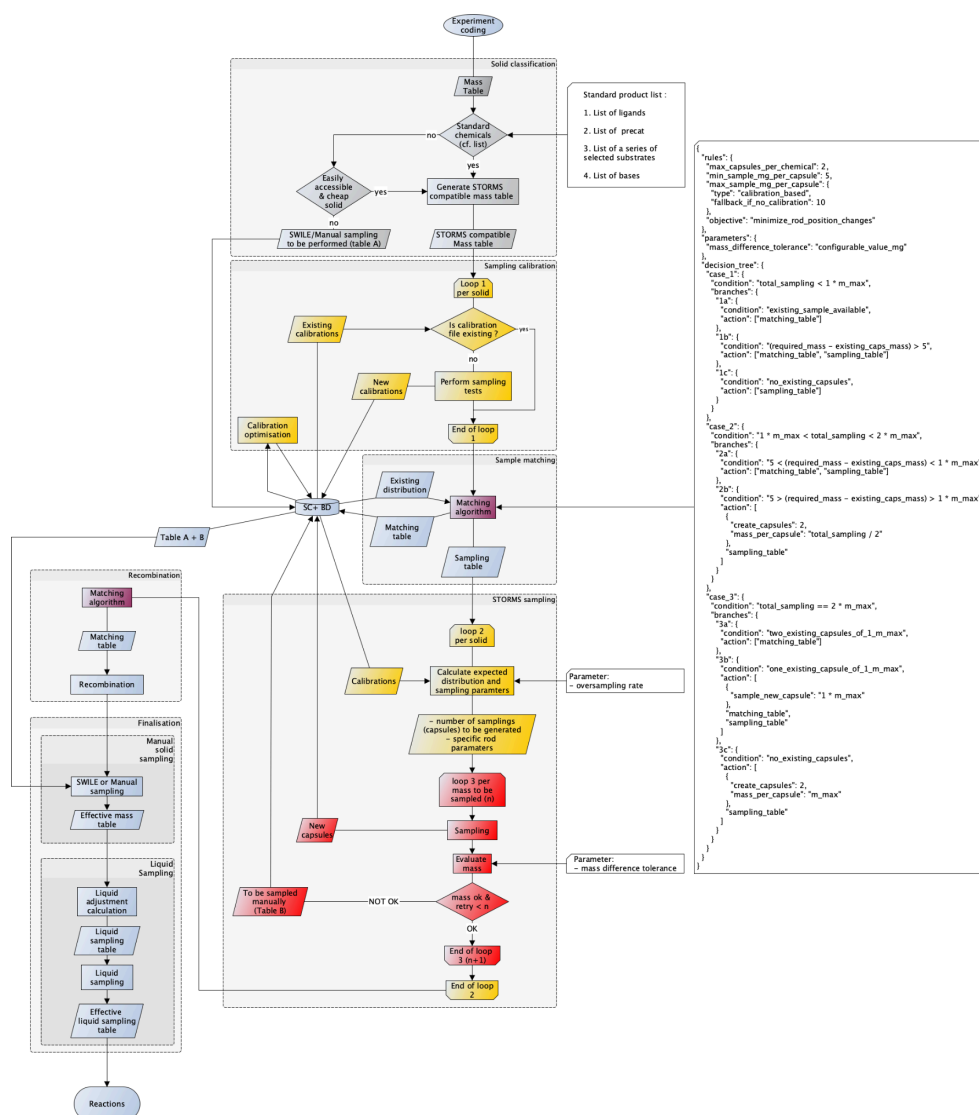

## S2 - Rule-based decision algorithm containing- decision rules and parameters for the *Matching algorithm* as set at EPFL Swiss Cat+ West Hub

### MASS MATCHING DECISION LOGIC

#### INPUT DEFINITIONS

- required\_mass\_mg  
Total target mass required for the chemical, expressed in mg.
- existing\_sample\_available  
Boolean variable indicating whether reusable sample material is available.
- existing\_match\_within\_tolerance  
Boolean variable indicating whether at least one valid combination of existing capsules already matches the required mass within mass\_difference\_tolerance\_mg.
- best\_existing\_match\_mass\_mg  
Mass in mg of the best reusable combination selected from existing capsules, with the constraint:  
best\_existing\_match\_mass\_mg < required\_mass\_mg
- existing\_capsule\_count  
Total number of reusable capsules currently available for the chemical.
- existing\_capsules\_of\_m\_max\_count  
Number of reusable capsules currently available with mass exactly equal to m\_max\_mg.
- m\_max\_mg  
Maximum allowable mass per capsule, expressed in mg.
- mass\_difference\_tolerance\_mg  
Acceptable tolerance on the mass difference, expressed in mg.

#### DERIVED VALUES

- small\_sampling\_threshold\_mg = 5
- min\_capsule\_mass\_mg = 3
- max\_capsules\_per\_chemical = 2
- max\_total\_mass\_mg = 2 \* m\_max\_mg
- no\_existing\_capsules = (existing\_capsule\_count = 0)
- one\_existing\_capsule\_of\_m\_max = (existing\_capsules\_of\_m\_max\_count = 1)
- two\_existing\_capsules\_of\_m\_max = (existing\_capsules\_of\_m\_max\_count >= 2)
- best\_existing\_match\_difference\_mg = ABS(required\_mass\_mg - best\_existing\_match\_mass\_mg)
- residual\_mass\_to\_sample\_mg = required\_mass\_mg - best\_existing\_match\_mass\_mg
- required\_capsule\_count =  
IF required\_mass\_mg <= m\_max\_mg THEN 1  
ELSE 2

#### RULES

- all masses are expressed in mg
- maximum capsules per chemical = 2
- minimum sample mass per capsule = 3 mg
- maximum sample mass per capsule = calibration-based m\_max\_mg
- if no calibration exists, use 10 mg as m\_max\_mg
- reuse existing capsules whenever possible before creating new capsules
- objective = minimize rod position changes
- existing\_match\_within\_tolerance = true means at least one valid combination of existing capsules satisfies:  
ABS(combination\_mass\_mg - required\_mass\_mg) <= mass\_difference\_tolerance\_mg
- best\_existing\_match\_mass\_mg must always satisfy:  
best\_existing\_match\_mass\_mg < required\_mass\_mg
- residual\_mass\_to\_sample\_mg must always satisfy:  
residual\_mass\_to\_sample\_mg > 0
- if residual\_mass\_to\_sample\_mg > 0, a sampling\_table must always be returned
- small\_sampling\_threshold\_mg only determines whether the missing mass is sampled as a small adjustment or as a standard new capsule decision branch
- no branch may return matching\_table alone if residual\_mass\_to\_sample\_mg > 0

#### OUTPUT DEFINITIONS

- matching\_table  
Table containing the selected existing capsules or reusable sample combinations used to satisfy all or part of the required mass.
- sampling\_table  
Table containing the quantities in mg that must be newly sampled to complete the required mass combination.
- create\_capsules  
Number of new capsules that must be created.
- mass\_per\_capsule\_mg

Target mass in mg for each newly created capsule when multiple capsules of equal mass are created.

- sample\_new\_capsule\_mg  
Target mass in mg for one newly created capsule when exactly one specific capsule mass must be sampled.

FUNCTIONAL LOGIC

```

IF required_mass_mg <= 0 THEN
  RETURN error
END IF
IF required_mass_mg > max_total_mass_mg THEN
  RETURN error
END IF
IF existing_match_within_tolerance = true THEN
  RETURN {
    matching_table,
    sampling_table: null,
    create_capsules: 0,
    mass_per_capsule_mg: null,
    sample_new_capsule_mg: null
  }
END IF
IF required_mass_mg <= m_max_mg THEN
  IF no_existing_capsules = true THEN
    RETURN {
      matching_table: null,
      sampling_table,
      create_capsules: 1,
      mass_per_capsule_mg: required_mass_mg,
      sample_new_capsule_mg: required_mass_mg
    }
  END IF
  IF existing_sample_available = true THEN
    IF residual_mass_to_sample_mg <= small_sampling_threshold_mg THEN
      RETURN {
        matching_table,
        sampling_table,
        create_capsules: 1,
        mass_per_capsule_mg: residual_mass_to_sample_mg,
        sample_new_capsule_mg: residual_mass_to_sample_mg
      }
    END IF
    IF residual_mass_to_sample_mg > small_sampling_threshold_mg THEN
      RETURN {
        matching_table,
        sampling_table,
        create_capsules: 1,
        mass_per_capsule_mg: residual_mass_to_sample_mg,
        sample_new_capsule_mg: residual_mass_to_sample_mg
      }
    END IF
  END IF
END IF
IF m_max_mg < required_mass_mg AND required_mass_mg < 2 * m_max_mg THEN
  IF no_existing_capsules = true THEN
    RETURN {
      matching_table: null,
      sampling_table,
      create_capsules: 2,
      mass_per_capsule_mg: required_mass_mg / 2,
      sample_new_capsule_mg: null
    }
  END IF
  IF residual_mass_to_sample_mg < m_max_mg THEN
    RETURN {
      matching_table,
      sampling_table,
      create_capsules: 1,
      mass_per_capsule_mg: residual_mass_to_sample_mg,
      sample_new_capsule_mg: residual_mass_to_sample_mg
    }
  END IF
  IF residual_mass_to_sample_mg >= m_max_mg THEN
    RETURN {
      matching_table,
      sampling_table,
      create_capsules: 2,
      mass_per_capsule_mg: required_mass_mg / 2,
      sample_new_capsule_mg: null
    }
  END IF
END IF
IF required_mass_mg = 2 * m_max_mg THEN
  IF two_existing_capsules_of_m_max = true THEN
    RETURN {
      matching_table,
      sampling_table: null,
      create_capsules: 0,

```

```
    mass_per_capsule_mg: null,  
    sample_new_capsule_mg: null  
  }  
END IF  
  
IF one_existing_capsule_of_m_max = true THEN  
  RETURN {  
    matching_table,  
    sampling_table,  
    create_capsules: 1,  
    mass_per_capsule_mg: m_max_mg,  
    sample_new_capsule_mg: m_max_mg  
  }  
END IF  
IF no_existing_capsules = true THEN  
  RETURN {  
    matching_table: null,  
    sampling_table,  
    create_capsules: 2,  
    mass_per_capsule_mg: m_max_mg,  
    sample_new_capsule_mg: null  
  }  
END IF  
RETURN {  
  matching_table,  
  sampling_table,  
  create_capsules: 2,  
  mass_per_capsule_mg: m_max_mg,  
  sample_new_capsule_mg: null  
}  
END IF
```

### S3 - Validation data for 1mm rod - masses from 0.1 to 1 mg

| Rod height (mm) | 1    | 2    | 3    | 4    | 5    |
|-----------------|------|------|------|------|------|
| Granulac 70     | 0.34 | 0.42 | 0.56 | 0.36 | 0.47 |
| Granulac 200    | 0.35 | 0.57 | 0.56 | 0.54 | 0.62 |
| Srbolac 400     | 0.34 | 0.64 | 0.74 | 0.90 | 0.90 |
| Tablettose 70   | 0.43 | 0.53 | 0.35 | 0.72 | 0.64 |
| Flowlac 100     | 0.27 | 0.52 | 0.79 | 0.89 | 1.16 |
| Spherolac 100   | 0.30 | 0.68 | 0.82 | 0.75 | 0.99 |
| Inhalac 70      | 0.30 | 0.54 | 0.70 | 0.61 | 0.39 |
| Inhalac 230     | 0.40 | 0.65 | 0.73 | 0.79 | 0.93 |
| Inhalac 500     | 0.31 | 0.37 | 0.35 | 0.43 | 0.35 |
| Bicarbonate Na  | 0.66 | 1.04 | 1.02 | 1.33 | 1.07 |

## S4 - Validation data for 2mm rod - masses from 1 to 10 mg

| product_name    | Rod height (mm) | mass (mg) |
|-----------------|-----------------|-----------|
| Bicarbonate Dec | 1               | 0.80      |
| Bicarbonate Dec | 2               | 3.91      |
| Bicarbonate Dec | 3               | 5.18      |
| Bicarbonate Dec | 4               | 7.41      |
| Bicarbonate Dec | 5               | 9.95      |
| Bicarbonate Dec | 6               | 11.64     |
| Bicarbonate Dec | 7               | 14.29     |
| Bicarbonate Dec | 8               | 14.01     |
| Bicarbonate Dec | 9               | 12.94     |
| FlowLac 100     | 1               | 0.83      |
| FlowLac 100     | 1               | 3.15      |
| FlowLac 100     | 2               | 1.89      |
| FlowLac 100     | 2               | 5.50      |
| FlowLac 100     | 3               | 3.10      |
| FlowLac 100     | 3               | 7.52      |
| FlowLac 100     | 4               | 4.39      |
| FlowLac 100     | 4               | 9.28      |
| FlowLac 100     | 5               | 5.93      |
| FlowLac 100     | 5               | 11.45     |
| FlowLac 100     | 6               | 7.03      |
| FlowLac 100     | 6               | 13.66     |
| FlowLac 100     | 7               | 8.27      |
| FlowLac 100     | 7               | 15.40     |
| FlowLac 100     | 8               | 9.45      |
| FlowLac 100     | 8               | 15.95     |
| FlowLac 100     | 9               | 10.80     |
| FlowLac 100     | 9               | 15.77     |
| FlowLac 100     | 9               | 8.47      |
| GranuLac 200    | 1               | 0.98      |
| GranuLac 200    | 2               | 2.69      |
| GranuLac 200    | 3               | 4.22      |
| GranuLac 200    | 4               | 5.70      |
| GranuLac 200    | 5               | 7.13      |

|              |   |       |
|--------------|---|-------|
| GranuLac 200 | 6 | 7.67  |
| GranuLac 200 | 7 | 8.53  |
| GranuLac 200 | 8 | 8.59  |
| GranuLac 200 | 9 | 9.15  |
| GranuLac 70  | 1 | 1.02  |
| GranuLac 70  | 2 | 2.85  |
| GranuLac 70  | 3 | 4.32  |
| GranuLac 70  | 4 | 5.99  |
| GranuLac 70  | 5 | 7.85  |
| GranuLac 70  | 6 | 8.83  |
| GranuLac 70  | 7 | 10.50 |
| GranuLac 70  | 8 | 11.17 |
| GranuLac 70  | 9 | 11.33 |
| InhaLac 230  | 1 | 0.89  |
| InhaLac 230  | 2 | 2.47  |
| InhaLac 230  | 3 | 3.74  |
| InhaLac 230  | 4 | 5.26  |
| InhaLac 230  | 5 | 7.24  |
| InhaLac 230  | 6 | 8.47  |
| InhaLac 230  | 7 | 10.13 |
| InhaLac 230  | 8 | 11.19 |
| InhaLac 230  | 9 | 13.12 |
| InhaLac 500  | 1 | 0.01  |
| InhaLac 500  | 2 | 0.02  |
| InhaLac 500  | 3 | 0.05  |
| InhaLac 500  | 4 | 2.32  |
| InhaLac 500  | 5 | 2.70  |
| InhaLac 500  | 6 | 2.41  |
| InhaLac 500  | 7 | 4.35  |
| InhaLac 500  | 8 | 2.34  |
| InhaLac 500  | 9 | 3.39  |
| InhaLac 70   | 1 | 1.14  |
| InhaLac 70   | 1 | 2.72  |
| InhaLac 70   | 1 | 2.65  |
| InhaLac 70   | 1 | 1.63  |
| InhaLac 70   | 1 | 1.2   |
| InhaLac 70   | 1 | 1.81  |
| InhaLac 70   | 1 | 1.97  |
| InhaLac 70   | 1 | 1.72  |
| InhaLac 70   | 1 | 2.29  |

|            |   |      |
|------------|---|------|
| InhaLac 70 | 1 | 1.52 |
| InhaLac 70 | 2 | 2.58 |
| InhaLac 70 | 2 | 3.45 |
| InhaLac 70 | 2 | 3.06 |
| InhaLac 70 | 2 | 3.07 |
| InhaLac 70 | 2 | 3.44 |
| InhaLac 70 | 2 | 3.53 |
| InhaLac 70 | 2 | 3.48 |
| InhaLac 70 | 2 | 3.22 |
| InhaLac 70 | 2 | 2.86 |
| InhaLac 70 | 2 | 3.12 |
| InhaLac 70 | 3 | 3.49 |
| InhaLac 70 | 3 | 4.36 |
| InhaLac 70 | 3 | 4.99 |
| InhaLac 70 | 3 | 4.28 |
| InhaLac 70 | 3 | 4.43 |
| InhaLac 70 | 3 | 4.91 |
| InhaLac 70 | 3 | 4.51 |
| InhaLac 70 | 3 | 4.13 |
| InhaLac 70 | 3 | 4.11 |
| InhaLac 70 | 3 | 4.38 |
| InhaLac 70 | 4 | 4.7  |
| InhaLac 70 | 4 | 5.42 |
| InhaLac 70 | 4 | 5.72 |
| InhaLac 70 | 4 | 5.56 |
| InhaLac 70 | 4 | 5.83 |
| InhaLac 70 | 4 | 5.58 |
| InhaLac 70 | 4 | 5.28 |
| InhaLac 70 | 4 | 6.36 |
| InhaLac 70 | 4 | 6.29 |
| InhaLac 70 | 4 | 5.31 |
| InhaLac 70 | 5 | 5.95 |
| InhaLac 70 | 5 | 7.64 |
| InhaLac 70 | 5 | 6.66 |
| InhaLac 70 | 5 | 6.43 |
| InhaLac 70 | 5 | 6.33 |
| InhaLac 70 | 5 | 7.24 |
| InhaLac 70 | 5 | 6.73 |
| InhaLac 70 | 5 | 7.38 |
| InhaLac 70 | 5 | 7.26 |

|              |   |       |
|--------------|---|-------|
| InhaLac 70   | 6 | 7.03  |
| InhaLac 70   | 6 | 8.08  |
| InhaLac 70   | 6 | 7.89  |
| InhaLac 70   | 6 | 8.19  |
| InhaLac 70   | 6 | 7.54  |
| InhaLac 70   | 6 | 8.27  |
| InhaLac 70   | 6 | 8.27  |
| InhaLac 70   | 6 | 8.12  |
| InhaLac 70   | 6 | 8.68  |
| InhaLac 70   | 7 | 8.36  |
| InhaLac 70   | 7 | 8.86  |
| InhaLac 70   | 7 | 9.2   |
| InhaLac 70   | 7 | 8.98  |
| InhaLac 70   | 7 | 9.55  |
| InhaLac 70   | 7 | 9.29  |
| InhaLac 70   | 7 | 9.39  |
| InhaLac 70   | 7 | 8.08  |
| InhaLac 70   | 7 | 8.76  |
| InhaLac 70   | 7 | 8.53  |
| InhaLac 70   | 8 | 8.72  |
| InhaLac 70   | 8 | 9.9   |
| InhaLac 70   | 8 | 10.06 |
| InhaLac 70   | 8 | 9.63  |
| InhaLac 70   | 8 | 9.92  |
| InhaLac 70   | 8 | 9.81  |
| InhaLac 70   | 8 | 9.79  |
| InhaLac 70   | 8 | 9.13  |
| InhaLac 70   | 8 | 8.89  |
| InhaLac 70   | 8 | 8.02  |
| InhaLac 70   | 9 | 9.65  |
| InhaLac 70   | 9 | 10.56 |
| InhaLac 70   | 9 | 10.43 |
| InhaLac 70   | 9 | 10.07 |
| InhaLac 70   | 9 | 9.79  |
| InhaLac 70   | 9 | 9.65  |
| InhaLac 70   | 9 | 9.09  |
| InhaLac 70   | 9 | 9.08  |
| InhaLac 70   | 9 | 8.97  |
| InhaLac 70   | 9 | 8.47  |
| SorboLac 400 | 1 | 0.98  |

|               |   |       |
|---------------|---|-------|
| SorboLac 400  | 2 | 2.59  |
| SorboLac 400  | 3 | 4.09  |
| SorboLac 400  | 4 | 5.50  |
| SorboLac 400  | 5 | 6.34  |
| SorboLac 400  | 6 | 6.37  |
| SorboLac 400  | 7 | 6.51  |
| SorboLac 400  | 8 | 6.45  |
| SorboLac 400  | 9 | 9.35  |
| SpheroLac 100 | 1 | 1.96  |
| SpheroLac 100 | 1 | 0.93  |
| SpheroLac 100 | 1 | 2.18  |
| SpheroLac 100 | 1 | 1.44  |
| SpheroLac 100 | 1 | 2.01  |
| SpheroLac 100 | 2 | 3.23  |
| SpheroLac 100 | 2 | 2.29  |
| SpheroLac 100 | 2 | 3.09  |
| SpheroLac 100 | 2 | 3.54  |
| SpheroLac 100 | 2 | 3.01  |
| SpheroLac 100 | 3 | 4.66  |
| SpheroLac 100 | 3 | 3.79  |
| SpheroLac 100 | 3 | 4.35  |
| SpheroLac 100 | 3 | 5.02  |
| SpheroLac 100 | 3 | 4.53  |
| SpheroLac 100 | 4 | 6.44  |
| SpheroLac 100 | 4 | 5.33  |
| SpheroLac 100 | 4 | 6.04  |
| SpheroLac 100 | 4 | 5.89  |
| SpheroLac 100 | 4 | 6.12  |
| SpheroLac 100 | 5 | 7.96  |
| SpheroLac 100 | 5 | 6.94  |
| SpheroLac 100 | 5 | 7.67  |
| SpheroLac 100 | 5 | 7.96  |
| SpheroLac 100 | 6 | 9.07  |
| SpheroLac 100 | 6 | 8.20  |
| SpheroLac 100 | 6 | 0.01  |
| SpheroLac 100 | 6 | 8.59  |
| SpheroLac 100 | 6 | 8.95  |
| SpheroLac 100 | 7 | 9.63  |
| SpheroLac 100 | 7 | 9.87  |
| SpheroLac 100 | 7 | 10.47 |

|               |   |       |
|---------------|---|-------|
| SpheroLac 100 | 7 | 10.55 |
| SpheroLac 100 | 7 | 10.33 |
| SpheroLac 100 | 8 | 9.58  |
| SpheroLac 100 | 8 | 10.95 |
| SpheroLac 100 | 8 | 11.52 |
| SpheroLac 100 | 8 | 11.43 |
| SpheroLac 100 | 8 | 11.61 |
| SpheroLac 100 | 9 | 9.52  |
| SpheroLac 100 | 9 | 12.25 |
| SpheroLac 100 | 9 | 12.13 |
| SpheroLac 100 | 9 | 12.66 |
| SpheroLac 100 | 9 | 12.58 |
| Tablettose 70 | 1 | 1.17  |
| Tablettose 70 | 2 | 2.44  |
| Tablettose 70 | 3 | 3.42  |
| Tablettose 70 | 4 | 4.54  |
| Tablettose 70 | 5 | 5.70  |
| Tablettose 70 | 6 | 6.81  |
| Tablettose 70 | 7 | 7.87  |
| Tablettose 70 | 8 | 9.04  |
